# Supplementary material for: Engineering Two-Dimensional Multilevel Supramolecular Assemblies from a Bifunctional Ligand on Au(111)
Source: MDPI journal article supplement (doi:10.3390/molecules28135116), 2023-06-29
Supplement: s1 [file s1]

Supporting Information *for*

# Engineering Two-Dimensional Multilevel Supramolecular Assemblies from a Bifunctional Ligand on Au(111)

Rongyu Tang <sup>1</sup>, Yang Song <sup>2</sup>, Lizhi Zhang <sup>2,\*</sup> and Ziliang Shi <sup>1,\*</sup>

<sup>1</sup> Center for Soft Condensed Matter Physics and Interdisciplinary Research, School of Physical Science and Technology, Soochow University, Suzhou 215006, China; 20204208014@stu.suda.edu.cn

<sup>2</sup> Laboratory of Theoretical and Computational Nanoscience, National Center for Nanoscience and Technology, Beijing 100190, China; songy2022@nanoctr.cn

\* Correspondence: zhanglz@nanoctr.cn (L.Z.); phzshi@suda.edu.cn (Z.S.)

## Table of Contents

|                                                                             |   |
|-----------------------------------------------------------------------------|---|
| 1) Table S1: Summary of complementary bonding motifs;                       | 2 |
| 2) Figure S1: STM simulation of the structures DBA·Na-II, DBA·Cs-I and -II; | 2 |
| 3) Figure S2: The reversible structural conversion of DBA·Cs-I and -II.     | 3 |

1) Summary of complementary bonding motifs.

In Table S1, we have summarized the number of the complementary bonding motifs for DBA-I and the three alkali-coordination nanostructures (DBA·Na-II, DBA·Cs-I and -II), according to our analysis of the corresponding DFT optimized atomic structural models. The chemical interactions of Br···Br, Br···O, Br···H and O···H are determined according to previous literatures [21,44-46].

**Table S1.** Summary complementary bonding motifs.

| Structure | DBA-I <sup>a</sup> |     | DBA·Na-II |     | DBA·Cs-I |     |     | DBA·Cs-II |     |     |
|-----------|--------------------|-----|-----------|-----|----------|-----|-----|-----------|-----|-----|
| Level     | 2nd                | 3rd | 1st       | 2nd | 1st      | 2nd | 3rd | 1st       | 2nd | 3rd |
| Br···H    | 6                  | 8   | 0         | 6   | 7        | 3   | 2   | 2         | 4   | 2.5 |
| O···H     | 2                  | 2   | 0         | 0   | 1        | 0   | 0   | 0         | 0   | 0   |
| Br···Br   | 2                  | 6   | 2         | 0   | 4        | 0   | 1   | 2         | 2   | 0   |
| Br···O    | 0                  | 4   | 0         | 2   | 2        | 0   | 0   | 0         | 1   | 0   |

<sup>a</sup>: The bond lengths in DBA-I are measured based on the tentative structural model.

2) STM simulation of the structures DBA·Na-II, DBA·Cs-I and -II.

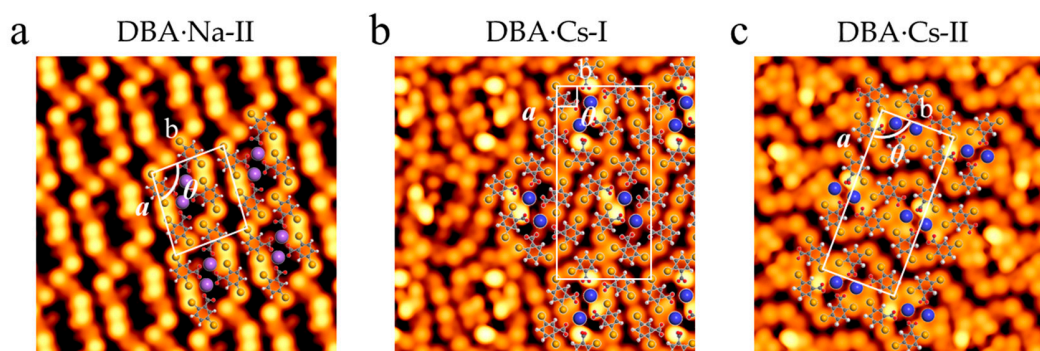

**Figure S1.** STM simulation of DBA·Na-II, DBA·Cs-I and DBA·Cs-II. Simulated STM images are covered with the corresponding atomic structural models. The white frames show the unit cells used in DFT calculations. The parameters of the unit cells ( $a$ ,  $b$  and  $\theta$ ) are (a) 1.80 nm, 1.60 nm, 94°; (b) 4.04 nm, 2.00 nm, 90°; and (c) 3.54 nm, 1.61 nm, 90.4°. The energy range for STM simulations is from -1.0 eV to the Fermi level, which is comparable with the bias voltages in the STM experiments (-1.2 ~ -0.5 V).

3) The reversible structural conversion of DBA·Cs-I and -II.

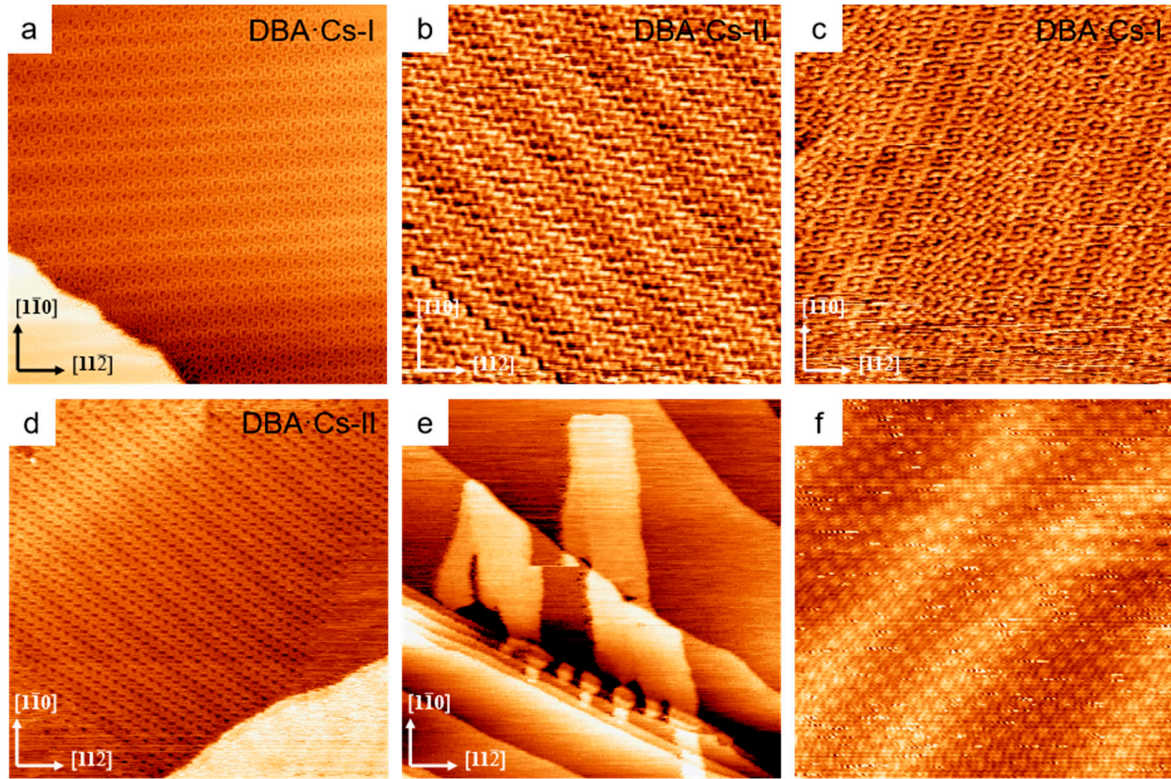

**Figure S2.** STM results of the reversible structural conversion of DBA·Cs-I and -II. (a) The pure phase of DBA·Cs-I after a codeposition of DBA (0.6 ML) with CsCl (0.16 ML) ( $50 \times 50$  nm;  $U = -1.2$  V,  $I = 200$  pA). (b) An STM image of the sample acquired after a post-deposition of CsCl (0.09 ML) ( $28 \times 28$  nm;  $U = -1.2$  V,  $I = 50$  pA). (c) An STM overview of the sample after a post-deposition of DBA (0.3 ML) ( $30 \times 30$  nm;  $U = -2.6$  V,  $I = 200$  pA). (d) An STM overview of the sample after a 450 K-annealing ( $62 \times 62$  nm;  $U = -1.2$  V,  $I = 50$  pA). (e) A typical CsCl bilayer structure on Au(111) ( $300 \times 300$  nm;  $U = -0.6$  V,  $I = 50$  pA). (f) The atomic-resolution of the CsCl bilayer ( $10 \times 10$  nm;  $U = -1.6$  V,  $I = 50$  pA), measuring the lattice constant of  $4.8 \text{ \AA}$ . 1 ML of DBA refers to a full coverage of the DBA-I structure on the surface. 1 ML of CsCl refers to a full coverage of the CsCl bilayer on the surface.
